# Supplementary material
Source: HighWire-hosted journal article supplement (https://cmajopen.ca/highwire/filestream/90394/field_highwire_adjunct_files/5/open-2022-0211-original-submission.pdf)
Supplement: open-2022-0211-original-submission.pdf [file open-2022-0211-original-submission.pdf]

1  
2  
3 **Impacts of Clinical Empathy on Outcomes for Canadians with Chronic**  
4  
5  
6 **Illnesses: A Qualitative Focus Group Study**  
7  
8  
9

10 Shira Gertsman BSc<sup>1</sup>, Ioana Cezara Ene BHSc<sup>1</sup>, Sasha Palmert<sup>1</sup> BSc, Amy Liu<sup>1</sup> BHSc, Mallika  
11  
12 Makkar<sup>1</sup> BSc, Ian Shao<sup>1</sup> BHSc, Johanna Shapiro PhD<sup>2</sup>, Connie Williams MD PhD<sup>3,4</sup>  
13  
14  
15  
16

17 **Affiliations:**  
18

19  
20 <sup>1</sup>Michael G. DeGroot School of Medicine, McMaster University, Hamilton, Ontario, Canada  
21

22 <sup>2</sup>Department of Family Medicine, UC Irvine School of Medicine, University of California Irvine,  
23  
24 Irvine, California, USA  
25

26  
27 <sup>3</sup>Department of Pediatrics, Faculty of Health Sciences, McMaster University, Hamilton, Ontario,  
28  
29 Canada  
30

31 <sup>4</sup>Dalla Lana School of Public Health, University of Toronto, Toronto, Ontario, Canada  
32  
33  
34  
35

36 **Corresponding author:**  
37

38 Shira Gertsman  
39

40 Email: shira.gertsman@medportal.ca  
41  
42  
43  
44

45 **Funding:**  
46

47 This work was funded by the McMaster Medical Student Research Excellence Scholarship  
48  
49 (MAC RES)  
50  
51  
52  
53

54 Authors declare that they have no competing interests.  
55  
56  
57  
58  
59  
60

## ABSTRACT

**Background:** Clinical empathy is the ability of a physician to understand a patient's illness experience, communicate this understanding, and act collaboratively to create a treatment plan.

Although clinical empathy provides substantial benefits to both physicians and patients, medical students typically experience a decline in empathy during training. The primary objective of this study was to generate a model of clinical empathy grounded in the perspectives of Canadians with chronic illnesses, to be used as a basis for empathy-focused curricular development in Canadian medical education.

**Methods:** Adults with chronic illness who recently saw a Canadian physician were recruited from virtual support groups. Each participant took part in a semi-structured virtual focus group. Focus group transcripts were coded using the constant comparative method and a theory was generated using constructivist grounded theory analysis.

**Results:** Twenty patients from across Canada participated in six focus groups. A two-sided theory of the presence and absence of clinical empathy was developed from patients' responses. Perceived presence of physician empathy engendered positive internal processing by patients leading to increased efficacy of healthcare delivery and enhanced mental health outcomes. Negative patient internal processing in response to perceived absence of empathy led to reduced quality and increased utilization of healthcare, disruptions in patients' personal lives, and negative physical and mental health outcomes.

**Interpretation:** Clinical empathy can have life-altering impacts on patients and its absence may increase resource utilization. As empathy involves understanding patients' lived experiences, any valid intervention to improve clinical empathy must be informed by patient perspectives.

## INTRODUCTION

The physician-patient relationship is a key contributor to the quality of healthcare, with physician empathy benefiting patients and physicians alike.<sup>1</sup> The construct of empathy has multiple components, namely affective (experiencing others' emotions), cognitive (understanding others' feelings), and behavioral (communicating understanding), with the latter two being of most importance in clinical scenarios.<sup>2-3</sup> Clinical empathy can thus be defined as the physician's ability to understand the patient's illness experience, communicate this understanding, and act on it to create a collaborative treatment plan with the patient.<sup>3-7</sup>

Empathetic care can improve patient mental health outcomes and coping,<sup>5,8-9</sup> as well as physical health outcomes such as improved HbA1c in patients with diabetes and faster recovery from the common cold.<sup>6,10</sup> Furthermore, empathetic care may promote patient understanding and confidence in their care plans, increasing adherence and reducing the perceived need for additional referrals and interventions.<sup>7,9</sup> From the physician perspective, higher patient-rated physician empathy scores are associated with reduced burnout,<sup>3,11-13</sup> lower risk of litigation,<sup>14</sup> and improved resource stewardship.<sup>15</sup>

Despite the clear benefits to both physicians and their patients, medical students experience a decline in empathy throughout training.<sup>1</sup> Various interventions have been attempted to mitigate this, including written reflections, dramatizations of clinical scenarios, and interpersonal skills training.<sup>16</sup> However, there is no consensus on their efficacy, and their development has lacked systematic input from patients with lived experiences. Existing literature on clinical empathy comprises studies performed on patients with specific disorders; as patients with complex and/or chronic illnesses typically interact with many different physicians, we hypothesize that patients' experiences of clinical empathy are not unique to particular diagnoses or physician specialties. It

1  
2  
3 is these overarching factors that are the most useful to inform undergraduate medical education  
4 since they are relevant to *all* future clinicians. Furthermore, data on patient experiences within  
5  
6 Canada are specifically scarce.  
7  
8  
9

10 The primary objective of this study was to generate a novel theoretical model of clinical  
11 empathy grounded in the perspectives of Canadian patients with a variety of chronic illnesses, in  
12 order to establish an evidence-base for empathy training in Canadian medical education. This  
13 involved elucidating how patients with chronic illnesses describe clinical empathy, their  
14 experiences of empathy from Canadian physicians, and subsequent impacts to their health and  
15 quality of life. The secondary objective was to collect patient opinions on how medical education  
16 could be improved to address deficits in empathy.  
17  
18  
19  
20  
21  
22  
23  
24  
25  
26  
27

## 28 **METHODS**

### 29 **Study Design**

30  
31 This was a patient-oriented, virtual, focus group-based qualitative study employing  
32  
33 constructivist grounded theory methodology.<sup>17-18</sup> This open-ended methodology was selected to  
34 generate a theory grounded in participants' lived experiences. Study conception was informed by  
35 discussion with patient, physician, and student partners.  
36  
37  
38  
39  
40  
41  
42  
43  
44

### 45 **Population & Recruitment**

46  
47 Participants were recruited from virtual support groups targeting Canadian patients with  
48 chronic illnesses [**Appendix A**]. This population was selected because patients with chronic  
49 illness are major utilizers of the healthcare system and typically have experiences with multiple  
50 physicians.<sup>19-20</sup> Facebook was selected as the primary recruitment platform due to its large and  
51  
52  
53  
54  
55  
56  
57  
58  
59  
60

1  
2  
3 diverse user base, accessibility, and interface that is ideal for support groups. Groups were  
4 selected that targeted Canadians with general chronic illness/disability or any of the ten most  
5 prevalent chronic diseases according to the Public Health Agency of Canada.<sup>21</sup> Due to a paucity  
6 of male participants, promotion was expanded to the Prostate Cancer Support Canada e-  
7 newsletter. Participants were included if they met the following eligibility criteria: at least 18  
8 years old, comfortable speaking English, self-identified as having a chronic illness (mental or  
9 physical) for at least 24 months, using the Canadian healthcare system as their primary source of  
10 medical care, and had an appointment with a Canadian physician in the previous 12 months.  
11 Endpoint for recruitment corresponded to the point of theoretical saturation, i.e., the point at  
12 which no new themes that contributed meaningfully to the theory being constructed were  
13 identified from newly collected data.<sup>22</sup>  
14  
15  
16  
17  
18  
19  
20  
21  
22  
23  
24  
25  
26  
27  
28  
29  
30

### 31 **Ethical Approval and Consent**

32  
33 This study was approved by the Hamilton Integrated Research Ethics Board #12912.  
34 Study procedures were explained to interested participants over the phone and consent was  
35 obtained verbally and by electronic signature before enrollment.  
36  
37  
38  
39  
40  
41

### 42 **Data Collection**

43  
44 All participants completed an anonymous demographics survey. Semi-structured virtual  
45 focus group interviews were conducted on Zoom by two members of the study team: one  
46 followed the moderator guide [**Appendix B**] while allowing for participants to guide the  
47 discussion as appropriate; the other asked follow-up questions and took live notes for  
48 triangulation purposes. The definition of clinical empathy was provided without use of the word  
49  
50  
51  
52  
53  
54  
55  
56  
57  
58  
59  
60

1  
2  
3 “empathy” to reduce the influence of participants’ variable definitions of this construct. S.G. was  
4 present at every focus group to ensure consistency across groups. Focus groups were recorded  
5  
6 with participant consent and transcribed verbatim.  
7  
8  
9

## 10 11 12 **Data Analysis** 13

14  
15 Iterative coding using the constant comparative method was performed concurrently with  
16 data collection.<sup>23</sup> Transcripts were coded independently by M.M. and S.P. who subsequently  
17 conferred to reach consensus on common themes. As new categories were identified, they were  
18 compared to previously identified categories to allow for combination and further delineation.  
19 We reached theoretical saturation following the coding of six focus group transcripts. Codes  
20 were verified with the live interview notes. At this point, member-checking was performed by  
21 sending descriptions of the codes derived from each transcript to the participants of the  
22 corresponding focus group for feedback [**Appendix C**], which was subsequently incorporated  
23 into the data.  
24  
25  
26  
27  
28  
29  
30  
31  
32  
33  
34

35 Individual quotations that corresponded to each code were reviewed by S.G. to determine  
36 sub-themes within codes (deductive analysis) and intercompared to determine multi-directional  
37 linkages between codes (inductive analysis), which were then visualized using idea-mapping  
38 software.<sup>24</sup> Quotations describing the presence versus absence of clinical empathy were distinct  
39 and plotted on separate mind maps. Several new codes were elicited in this process. Reflexive  
40 notetaking was performed and discussed with team members to ensure that mapped linkages  
41 corresponded to patient descriptions rather than researcher-assumed phenomena. The  
42 relationships between codes were simplified and averaged, with preservation of grouping and  
43  
44  
45  
46  
47  
48  
49  
50  
51  
52  
53  
54  
55  
56  
57  
58  
59  
60

1  
2  
3 directionality as much as possible, to construct an overarching model of the impacts of clinical  
4  
5 empathy on Canadian patients with chronic illnesses.  
6  
7

## 8 9 10 **RESULTS**

### 11 **Participants**

12  
13  
14  
15 Twenty patients participated across six focus groups. Participant demographics are  
16  
17 summarized in **Table 1**. Diagnosis was not formally elicited, but diagnoses that patients  
18  
19 volunteered included rheumatoid arthritis, asthma, cancer, and fibromyalgia. Participates rated  
20  
21 their overall satisfaction with the Canadian Healthcare System as a mean of 5.4/10 (median = 5).  
22  
23

### 24 25 26 **Clinical empathy model**

27  
28 The patient-derived model of clinical empathy is depicted in **Figure 1**. Components of  
29  
30 each item in the model and representative participant quotations are included in **Tables 2 and 3**.  
31  
32 Further details of the patient-perceived phenomena can be found in **Appendix D**.  
33  
34

#### 35 36 37 *Perceived absence or deficiency of clinical empathy*

38  
39  
40 Patients postulated that internal factors (burnout, biases) and external factors (setting,  
41  
42 specialty, patient load, ableist culture of medicine) predispose physicians to interact with them  
43  
44 with a lack of trust and understanding. This may manifest in a failure to display supportive  
45  
46 behaviours, or even in outright antagonistic behaviours such as name-calling and patient-  
47  
48 blaming. Patients process these experiences in ways that reduce their trust in physicians and the  
49  
50 healthcare system and compromise their self-image. Ripple effects impact crucial elements of  
51  
52 their personal lives, including work and family relationships. These processes are also  
53  
54  
55  
56  
57  
58  
59  
60

1  
2  
3 interrelated with a decreased quality of healthcare delivery despite increasing resource utilization  
4  
5 (e.g. unnecessary referrals and more appointments); for instance, non-empathetic care makes  
6  
7 patients more likely to delay seeking care until severely ill due to fears of re-traumatization, and  
8  
9 promotes non-adherence to prescribed treatment regimens. Through a feedback loop, these  
10  
11 outcomes amplify the pre-existing factors inhibiting physician empathy. Impacts on patient  
12  
13 cognition, personal life, and healthcare form a vicious cycle that leads to a spiral of worsening  
14  
15 physical and mental health outcomes. Impact on mental health was the most prevalent theme  
16  
17 with over twice as many quotations as any other code (66 quotations). Patients described  
18  
19 exhaustion, hopelessness, helplessness, anxiety, depression, and suicidal ideation occurring as  
20  
21 downstream effects of clinical empathy deficiency.  
22  
23  
24  
25  
26  
27

### 28 *Perceived presence of clinical empathy*

29  
30  
31 Patients believe that factors such as having had a patient-centred medical education and  
32  
33 adequate support and resources allow physicians to engage with patients' experiences and exhibit  
34  
35 clinical empathy. Empathetic behaviours include listening, honest and supportive  
36  
37 communication, and collaborative care plan formulation. This engenders a positive internal  
38  
39 response from the patient characterized by feelings of hope, empowerment, and trust in their  
40  
41 physician and treatment plan, which promotes a cycle of improved treatment adherence and more  
42  
43 effective resource utilizations. Participants said that the hope provided by physician validation is  
44  
45 the most crucial thing for patients living with chronic illness – with this, patients feel motivated  
46  
47 to self-manage their health via lifestyle improvements, treatment adherence, attending  
48  
49 appointments appropriately, and educating themselves about their medical condition. Overall, the  
50  
51 downstream effects of clinical empathy enhance patients' health and well-being by improving  
52  
53  
54  
55  
56  
57  
58  
59  
60



1  
2  
3 their self-image and self-efficacy, their mood and mental health, and even how they perceive  
4 their symptoms and pain.  
5  
6

### 7 *Patient recommendations for medical education*

8  
9  
10 Patients shared changes to medical school admissions and training that they believed  
11 could improve clinical empathy (**Table 4**). They also acknowledged that supporting physicians'  
12 mental health and mitigating burnout is an essential for any intervention to have sustainable  
13 impact.  
14  
15  
16  
17  
18  
19  
20

## 21 **INTERPRETATION**

22  
23  
24 To our knowledge, this is the first patient-oriented study on the impacts of clinical  
25 empathy on the health and quality of life of Canadians with chronic illnesses. Patients perceive  
26 clinical empathy, or its absence, as initiators of self-perpetuating cycles of positive or negative  
27 health outcomes, respectively. Some outcomes are mediated by the impact of empathy on  
28 therapy and disease course, but empathy also triggers direct, independent impacts.  
29  
30  
31  
32  
33  
34

35  
36 The interplay among physical illness, mental illness, and resource utilization is  
37 inextricable. Patients with chronic illnesses utilize significant healthcare resources: in Canada,  
38 over 50% of the adult population has at least one chronic disease,<sup>19</sup> costing the Canadian  
39 economy an estimated \$190 billion annually in direct and indirect costs.<sup>20</sup> In this study,  
40 participants with any chronic illness were eligible, though all participants identified as having a  
41 physical (35%) or mixed physical and mental (65%) illness. It is well-established that having a  
42 diagnosis of a chronic physical illness significantly increases the risk of psychiatric  
43 comorbidities and vice versa.<sup>25-29</sup> A cohort study of nearly 100,000 adults in Alberta, Canada  
44 demonstrated that among patients with a chronic physical illness, those with a comorbid mental  
45  
46  
47  
48  
49  
50  
51  
52  
53  
54  
55  
56  
57  
58  
59  
60

1  
2  
3 health disorder had 70% higher total three-year adjusted costs, and higher resource use including  
4 hospitalization and emergency department visits;<sup>30</sup> another prospective cohort study  
5  
6 demonstrated that depressive symptoms are associated with higher health resource utilization  
7  
8 after acute myocardial infarction independent of cardiovascular risk.<sup>27</sup>  
9  
10

11  
12 In the current study, the impact of physician-patient interactions on patients' mental  
13 health trajectories was the theme most emphasized by patients. Congruent with previous  
14 evidence,<sup>31-32</sup> being disbelieved and dismissed appears to have profound negative impacts on  
15 patients' self-worth, identities, and mental health. Sloan et al. (2020) demonstrated that elevated  
16 patient anxiety during medical encounters may in some cases be attributable to medical post-  
17 traumatic stress following negative medical experience rather than trauma from the illness  
18 itself.<sup>31</sup> Many positive experiences may be required to rebuild medical trust, while a single  
19 negative experience can cause significant regression.<sup>31</sup> Our findings further demonstrate that  
20 anxiety born from negative experience is often generalized to systems and other physicians,  
21 while positive experiences build trust in the specific enacting physician and are less likely to be  
22 generalized. Moreover, these infractions need not be major – the relative position of authority of  
23 physicians makes patients' confidence in self-assessment particularly vulnerable to damage from  
24 even small expressions of physician doubt and increases the likelihood of resultant depression.<sup>32-</sup>  
25  
26  
27  
28  
29  
30  
31  
32  
33  
34  
35  
36  
37  
38  
39  
40  
41

42 33

43  
44 It is important to emphasize that in most cases, physicians whom patients perceive to be  
45 acting without clinical empathy are doing their best to serve their patients within the limitations  
46 of their institutions, training, and experiences.<sup>1</sup> The call to address the clinical empathy crisis is  
47 not an attack on physicians, but a recognition of the systems that disempower physicians from  
48 interacting with patients in ways that promote better outcomes for everyone. Our healthcare  
49  
50  
51  
52  
53  
54  
55  
56  
57  
58  
59  
60

1  
2  
3 system, already strained before the COVID-19 pandemic, has been pushed to the brink.<sup>34</sup> It is  
4  
5 essential that we prevent non-empathetic care from further straining the healthcare system  
6  
7 through direct and downstream harm. Enhancing clinical empathy has no financial cost, need not  
8  
9 require significantly more time per visit,<sup>35</sup> and may even save time by minimizing  
10  
11 miscommunication. Providing care with clinical empathy is imperative not only for the health  
12  
13 and wellbeing of the patients in front of us, but for the durability of the healthcare system.  
14  
15  
16  
17  
18

### 19 **Future directions**

20  
21 This patient-perspective study is part of the Empathy in Medical Professionals:  
22  
23 Augmenting Curriculum and Training (EMPACT) project, which seeks to amplify the voices of  
24  
25 Canadian patients and inform innovation in medical education. Patients agreed that clinical  
26  
27 empathy should be an essential part of physician training and offered a variety of suggestions.  
28  
29 Acknowledging that understanding patients' experiences can be challenging for those without  
30  
31 firsthand experience of chronic illness, they suggested that increased patient involvement in  
32  
33 medical training (e.g. through sharing stories with students) and admission of more students with  
34  
35 personal illness experiences may foster more understanding.<sup>36-37</sup> Currently, medical students with  
36  
37 chronic illnesses and disabilities are significantly underrepresented and under-supported,<sup>38</sup> and  
38  
39 this exclusion of patients from the medical profession perpetuates the “othering of the sick  
40  
41 person” and an ableist culture that hinders clinical empathy.<sup>1</sup> We can begin by including patients  
42  
43 in the development and implementation of medical school curricula and increasing the  
44  
45 accessibility of the medical field to students with medical conditions.<sup>36,39</sup> Future phases of the  
46  
47 EMPACT project will collect data from Canadian medical schools and medical students to  
48  
49  
50  
51  
52  
53  
54  
55  
56  
57  
58  
59  
60

1  
2  
3 characterize the current state of clinical empathy training in Canada and inform development of  
4 educational interventions that meet the needs of both patients and students.  
5  
6  
7  
8  
9

## 10 **Limitations**

11  
12 Despite researcher attempts to increase sample diversity through recruitment expansion  
13 and specific calls for diverse populations on follow-up advertisement posts, the study sample  
14 consisted of mostly women, only 20% of participants self-identified as being a member of a  
15 visible minority, and none identified as Indigenous. Furthermore, all participants required access  
16 to a device with internet, possibly excluding individuals of lower socioeconomic status. As  
17 discrimination was commonly identified as a barrier to empathy, it is likely that more  
18 marginalized populations would face these obstacles to an even greater extent in addition to  
19 unique barriers.  
20  
21  
22  
23  
24  
25  
26  
27  
28  
29  
30  
31  
32

## 33 **Conclusion**

34  
35 Although it has been known that empathy augments patient care, these patient stories  
36 indicate that acting with clinical empathy is not a luxury, but a necessity – its absence is not  
37 neutral, it causes harm. The knowledge that clinical interactions can impact a patient's health,  
38 self-concept, and quality of life should be treated with the same responsibility as any other  
39 medical intervention. In the words of one participant: "Being a doctor doesn't just mean curing  
40 or giving medicine or diagnoses. [...] Like, I wouldn't want to be a doctor for the totally honest  
41 truth. The responsibility, to me, is just so great. So, I give my hat off to anyone who wants to be  
42 in medicine, I'm very grateful [...], because we really do need them. But we really need them to  
43 help us, too."  
44  
45  
46  
47  
48  
49  
50  
51  
52  
53  
54  
55  
56  
57  
58  
59  
60

## ACKNOWLEDGEMENTS

The authors would like to thank the following individuals: Ophira Calof for providing a patient perspective on study objectives and design; Aurgcho Datta and Gerry Huynh for their hard work transcribing focus group recordings; Allison Hoffman, Emiliyan Staykov, Emily Ding Au, and Erin Vink for participating in the pilot focus group and offering feedback; Sarah Klapman for editing the manuscript; and, Sabrina Rioux for designing the beautiful EMPACT logo.

Confidential

**REFERENCES**

- 1 Shapiro J. Walking a mile in their patients' shoes: empathy and othering in medical students' education. *Philos Ethics Humanit Med*. 2008 Mar 12;3:10. doi: 10.1186/1747-5341-3-10.
- 2 Hojat, M. A definition and key features of empathy in patient care. In: *Empathy in patient care* [Internet]. New York, NY: Springer; 2007. p. 77-85. Available from: [https://doi.org/10.1007/0-387-33608-7\\_6](https://doi.org/10.1007/0-387-33608-7_6)
- 3 Robieux L, Karsenti L, Pocard M, Flahault C. Let's talk about empathy! *Patient Educ Couns*. 2018 Jan;101(1):59-66. doi: 10.1016/j.pec.2017.06.024. Epub 2017 Jun 19.
- 4 Kazimi M, Terndrup T, Tait R, Frey JA, Strassels S, Emerson G, Todd KH. Cultivating emergency physician behavioral empathy to improve emergency department care for pain and prescription opioid misuse. *J Am Coll Emerg Physicians Open*. 2020 May 17;1(6):1480-1485. doi: 10.1002/emp2.12086.
- 5 Too A, Gatien C, Cormier S. Treatment satisfaction mediates the association between perceived physician empathy and psychological distress in a community sample of individuals with chronic pain. *Patient Educ Couns*. 2021 May;104(5):1213-1221. doi: 10.1016/j.pec.2020.09.004. Epub 2020 Sep 8.
- 6 Rakel D, Barrett B, Zhang Z, Hoeft T, Chewning B, Marchand L, Scheder J. Perception of empathy in the therapeutic encounter: effects on the common cold. *Patient Educ Couns*. 2011 Dec;85(3):390-7. doi: 10.1016/j.pec.2011.01.009. Epub 2011 Feb 5.
- 7 Stewart M, Brown JB, Donner A, McWhinney IR, Oates J, Weston WW, Jordan J. The impact of patient-centered care on outcomes. *J Fam Pract*. 2000 Sep;49(9):796-804.
- 8 Zachariae R, Pedersen CG, Jensen AB, Ehrnrooth E, Rossen PB, von der Maase H. Association of perceived physician communication style with patient satisfaction, distress, cancer-related self-efficacy, and perceived control over the disease. *Br J Cancer*. 2003 Mar 10;88(5):658-65. doi: 10.1038/sj.bjc.6600798.
- 9 Street RL Jr, Makoul G, Arora NK, Epstein RM. How does communication heal? Pathways linking clinician-patient communication to health outcomes. *Patient Educ Couns*. 2009 Mar;74(3):295-301. doi: 10.1016/j.pec.2008.11.015. Epub 2009 Jan 15.
- 10 Hojat M, Louis DZ, Markham FW, Wender R, Rabinowitz C, Gonnella JS. Physicians' empathy and clinical outcomes for diabetic patients. *Acad Med*. 2011 Mar;86(3):359-64. doi: 10.1097/ACM.0b013e3182086fe1.
- 11 Picard J, Catu-Pinault A, Boujut E, Botella M, Jaury P, Zenasni F. Burnout, empathy and their relationships: a qualitative study with residents in General Medicine. *Psychol Health Med*. 2016;21(3):354-61. doi: 10.1080/13548506.2015.1054407. Epub 2015 Jun 15.
- 12 Lamothe M, Boujut E, Zenasni F, Sultan S. To be or not to be empathic: the combined role of empathic concern and perspective taking in understanding burnout in general practice. *BMC Fam Pract*. 2014 Jan 23;15:15. doi: 10.1186/1471-2296-15-15.

- 13 Zwack J, Schweitzer J. If every fifth physician is affected by burnout, what about the other four? Resilience strategies of experienced physicians. *Acad Med*. 2013 Mar;88(3):382-9. doi: 10.1097/ACM.0b013e318281696b.
- 14 Smith DD, Kellar J, Walters EL, Reibling ET, Phan T, Green SM. Does emergency physician empathy reduce thoughts of litigation? A randomised trial. *Emerg Med J*. 2016 Aug;33(8):548-52. doi: 10.1136/emered-2015-205312. Epub 2016 Mar 21.
- 15 Schupp CJ, Berbaum K, Berbaum M, Lang EV. Pain and anxiety during interventional radiologic procedures: effect of patients' state anxiety at baseline and modulation by nonpharmacologic analgesia adjuncts. *J Vasc Interv Radiol*. 2005 Dec;16(12):1585-92. doi: 10.1097/01.RVI.0000185418.82287.72.
- 16 Batt-Rawden SA, Chisolm MS, Anton B, Flickinger TE. Teaching empathy to medical students: an updated, systematic review. *Acad Med*. 2013 Aug;88(8):1171-7. doi: 10.1097/ACM.0b013e318299f3e3.
- 17 Charmaz, K. *Constructing grounded theory*. 2nd ed. Thousand Oaks, CA: Sage; 2014.
- 18 Sebastian K. Distinguishing between the strains grounded theory: Classical, interpretive and constructivist. *Journal for Social Thought*. 2019 Jul 10;3(1).
- 19 Montague T, Nemis-White J, Ayles J, Torr E, Martin L, MacPherson N, et al. Chronic diseases in Canada: contemporary burden and management. *Health Care in Canada Survey*. 2019 May. Available from: [https://www.mcgill.ca/hcic-sssc/files/hcic-sssc/hcic\\_chronic\\_disease\\_in\\_canada\\_burden\\_and\\_management\\_2019.pdf](https://www.mcgill.ca/hcic-sssc/files/hcic-sssc/hcic_chronic_disease_in_canada_burden_and_management_2019.pdf)
- 20 Chronic Disease Prevention Alliance of Canada. 2018 pre-budget submission to the House of Commons Standing Committee on Finance. 2017 Aug. Available from: <https://www.ourcommons.ca/Content/Committee/421/FINA/Brief/BR9073636/br-external/ChronicDiseasePreventionAllianceOfCanada-e.pdf>
- 21 Statistics Canada [Internet]. Ottawa: Statistics Canada; 2022. *Canadian Community Health Survey 2017–2018*; Updated 2019 Oct 22. Available from: <https://www150.statcan.gc.ca/n1/daily-quotidien/191022/dq191022d-eng.htm>
- 22 Glaser B, Strauss A. *The discovery of grounded theory: Strategies for qualitative research*. Chicago: Aldine;1967.
- 23 Ng S, Lingard L, Kennedy TJ. Qualitative research in medical education: Methodologies and methods. In: Swanwick T, editor. *Understanding medical education: Evidence, theory and practice*. 2nd ed. United Kingdom: The Association for the Study of Medical Education; 2014. p. 371-384
- 24 Meister Labs. MindMeister. 2022. Available from: <https://www.mindmeister.com>
- 25 Barberio B, Zamani M, Black CJ, Savarino EV, Ford AC. Prevalence of symptoms of anxiety and depression in patients with inflammatory bowel disease: a systematic review and meta-analysis. *Lancet Gastroenterol Hepatol*. 2021 May;6(5):359-370. doi: 10.1016/S2468-1253(21)00014-5. Epub 2021 Mar 12.

- 1  
2  
3 26 Johansen H. Living with heart disease--the working-age population. *Health Rep.* 1999  
4 Spring;10(4):33-45(ENG); 31-45(FRE). English, French.  
5
- 6 27 Kurdyak PA, Gnam WH, Goering P, Chong A, Alter DA. The relationship between depressive  
7 symptoms, health service consumption, and prognosis after acute myocardial infarction: a  
8 prospective cohort study. *BMC Health Serv Res.* 2008 Sep 30;8:200. doi: 10.1186/1472-6963-8-  
9 200.  
10
- 11 28 Dixon L, Weiden P, Delahanty J, Goldberg R, Postrado L, Lucksted A, Lehman A. Prevalence  
12 and correlates of diabetes in national schizophrenia samples. *Schizophr Bull.* 2000;26(4):903-12.  
13 doi: 10.1093/oxfordjournals.schbul.a033504.  
14
- 15 29 Goff DC, Sullivan LM, McEvoy JP, Meyer JM, Nasrallah HA, Daumit GL, Lamberti S,  
16 D'Agostino RB, Stroup TS, Davis S, Lieberman JA. A comparison of ten-year cardiac risk  
17 estimates in schizophrenia patients from the CATIE study and matched controls. *Schizophr Res.*  
18 2005 Dec 1;80(1):45-53. doi: 10.1016/j.schres.2005.08.010. Epub 2005 Sep 28.  
19  
20
- 21 30 Sporinova B, Manns B, Tonelli M, Hemmelgarn B, MacMaster F, Mitchell N, Au F, Ma Z,  
22 Weaver R, Quinn A. Association of Mental Health Disorders With Health Care Utilization and  
23 Costs Among Adults With Chronic Disease. *JAMA Netw Open.* 2019 Aug 2;2(8):e199910. doi:  
24 10.1001/jamanetworkopen.2019.9910.  
25
- 26 31 Sloan M, Lever E, Gordon C, Harwood R, Georgopoulou S, Naughton F, Wincup C, Sutton S,  
27 D'Cruz D. Medication decision-making and adherence in lupus: patient-physician discordance  
28 and the impact of previous 'adverse medical experiences'. *Rheumatology (Oxford).* 2022 Apr  
29 11;61(4):1417-1429. doi: 10.1093/rheumatology/keab534.  
30  
31
- 32 32 Ruzicka A. Considering the influences of the physician-patient relationship on the patient's  
33 quality of life: An interpretive phenomenological analysis of the experience of being dismissed  
34 by one's physician among women with autoimmune diseases [Dissertation]. Ann Arbor, MI:  
35 ProQuest LLC; 2013. Available from:  
36 <https://www.proquest.com/docview/1430475143?fromopenview=true&pq-origsite=gscholar>  
37
- 38 33 Liu RT, Alloy LB, Abramson LY, Iacoviello BM, Whitehouse WG. Emotional maltreatment and  
39 depression: prospective prediction of depressive episodes. *Depress Anxiety.* 2009;26(2):174-81.  
40 doi: 10.1002/da.20545.  
41
- 42 34 Smart, K. Commentary: Canada's health system is on life support; reform needed now. *CMA*  
43 *News* [Internet]. 2022 Apr 1. Available from: [https://www.cma.ca/news/commentary-canadas-](https://www.cma.ca/news/commentary-canadas-health-system-life-support-reform-needed-now)  
44 [health-system-life-support-reform-needed-now](https://www.cma.ca/news/commentary-canadas-health-system-life-support-reform-needed-now)  
45
- 46 35 Singh Ospina N, Phillips KA, Rodriguez-Gutierrez R, Castaneda-Guarderas A, Gionfriddo MR,  
47 Branda ME, Montori VM. Eliciting the Patient's Agenda- Secondary Analysis of Recorded  
48 Clinical Encounters. *J Gen Intern Med.* 2019 Jan;34(1):36-40. doi: 10.1007/s11606-018-4540-5.  
49 Epub 2018 Jul 2.  
50  
51
- 52 36 Agaronnik ND, Saberi SA, Stein MA, Tolchin DW. Why Disability Must Be Included in Medical  
53 School Diversification Efforts. *AMA J Ethics.* 2021 Dec 1;23(12):E981-986. doi:  
54 10.1001/amajethics.2021.981.  
55  
56  
57  
58  
59  
60



- 1  
2  
3 37 Stergiopoulos E, Fernando O, Martimianakis MA. "Being on Both Sides": Canadian Medical  
4 Students' Experiences With Disability, the Hidden Curriculum, and Professional Identity  
5 Construction. *Acad Med*. 2018 Oct;93(10):1550-1559. doi: 10.1097/ACM.0000000000002300.  
6  
7 38 Gault MA, Raha SS, Newell C. Perception of disability as a barrier for Canadian medical  
8 students. *Can Fam Physician*. 2020 Mar;66(3):169-171.  
9  
10 39 UBC Health [Internet]. Vancouver: University of British Columbia; 2022. Patient and community  
11 advisory committee [cited 2022 Sep 19]. Available from: [https://health.ubc.ca/what-ubc-](https://health.ubc.ca/what-ubc-health/ubc-health-structure/patient-and-community-advisory-committee)  
12 [health/ubc-health-structure/patient-and-community-advisory-committee](https://health.ubc.ca/what-ubc-health/ubc-health-structure/patient-and-community-advisory-committee)  
13  
14  
15  
16  
17  
18  
19  
20  
21  
22  
23  
24  
25  
26  
27  
28  
29  
30  
31  
32  
33  
34  
35  
36  
37  
38  
39  
40  
41  
42  
43  
44  
45  
46  
47  
48  
49  
50  
51  
52  
53  
54  
55  
56  
57  
58  
59  
60

Confidential

1  
2  
3  
4  
5  
6  
7  
8  
9  
10  
11  
12  
13  
14  
15  
16  
17  
18  
19  
20  
21  
22  
23  
24  
25  
26  
27  
28  
29  
30  
31  
32  
33  
34  
35  
36  
37  
38  
39  
40  
41  
42  
43  
44  
45  
46  
47

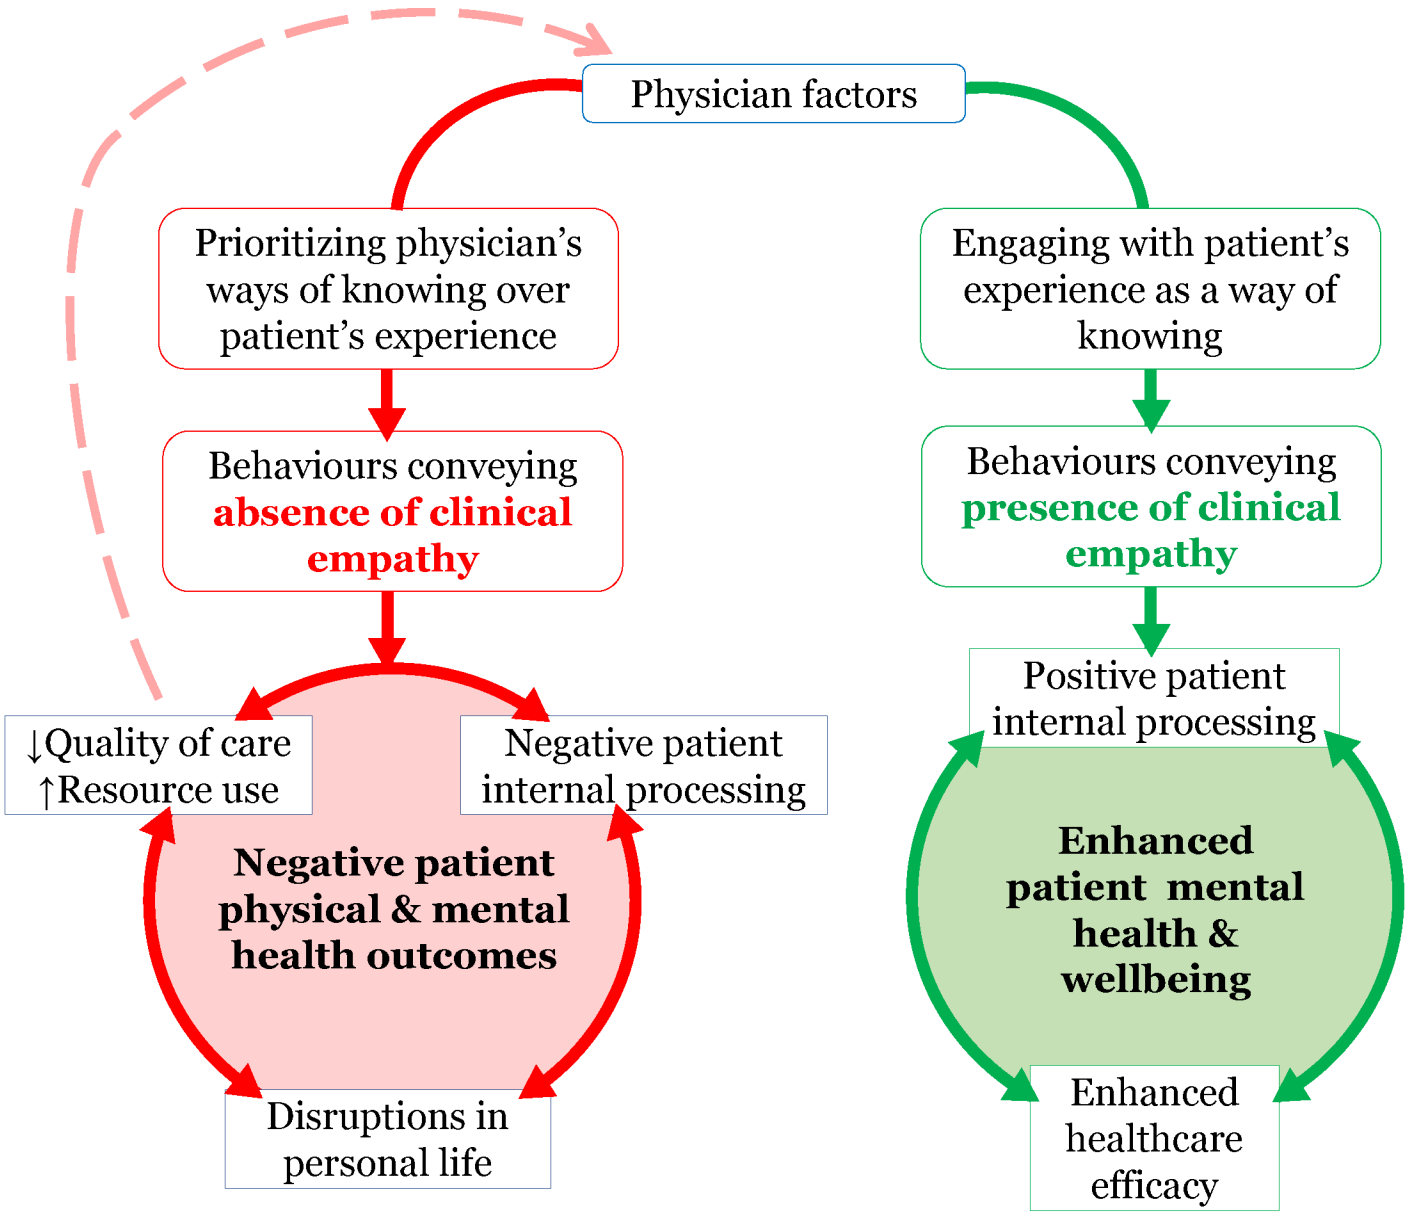

**Table 1.** Participant characteristics according to responses on the Demographic Survey.

| <b>Characteristics</b>                                                               | <b>Number of participants, <i>n</i> (%)</b> |
|--------------------------------------------------------------------------------------|---------------------------------------------|
| <b>Gender identity</b>                                                               |                                             |
| Woman                                                                                | 17 (85%)                                    |
| Man                                                                                  | 3 (15%)                                     |
| <b>Age (years)</b>                                                                   |                                             |
| 18-35                                                                                | 4 (20%)                                     |
| 36-55                                                                                | 8 (40%)                                     |
| 56-75                                                                                | 7 (35%)                                     |
| 75+                                                                                  | 1 (5%)                                      |
| <b>Education</b>                                                                     |                                             |
| High school graduate                                                                 | 2 (10%)                                     |
| Some post-secondary studies, no degree                                               | 4 (20%)                                     |
| College or vocational degree                                                         | 5 (25%)                                     |
| Undergraduate degree                                                                 | 6 (30%)                                     |
| Post-graduate degree                                                                 | 3 (15%)                                     |
| <b>Identification as visible minority</b>                                            |                                             |
| Yes                                                                                  | 4 (20%) <sup>a</sup>                        |
| No                                                                                   | 16 (80%)                                    |
| <b>Province/territory in which patient primarily receives healthcare<sup>b</sup></b> |                                             |
| Alberta                                                                              | 1 (5%)                                      |
| British Columbia                                                                     | 4 (20%)                                     |
| Manitoba                                                                             | 1 (5%)                                      |
| Newfoundland & Labrador                                                              | 1 (5%)                                      |
| Nova Scotia                                                                          | 1 (5%)                                      |
| Ontario                                                                              | 12 (60%)                                    |
| Saskatchewan                                                                         | 1 (5%)                                      |
| <b>Region of residence</b>                                                           |                                             |
| Rural                                                                                | 4 (20%)                                     |
| Urban/Population centre                                                              | 16 (80%)                                    |
| Pop. 30,000-99,999                                                                   | 4 (20%)                                     |
| Pop. 100,000-499,999                                                                 | 7 (35%)                                     |
| Pop. 500,000+                                                                        | 5 (25%)                                     |
| <b>Classification of chronic illness</b>                                             |                                             |
| Primarily physical                                                                   | 7 (35%)                                     |
| Primarily mental                                                                     | 0 (0%)                                      |
| Both                                                                                 | 13 (65%)                                    |

<sup>a</sup>Participant self-descriptors included “Asian”, “Half-Iranian”, and “Eurasian”. No participants self-identified as Indigenous.

<sup>b</sup>Total percentage exceeds 100% because one participant received healthcare in multiple provinces. Recruitment was open to residents of all provinces and territories – those not included in table had zero participants.

**Table 2.** Components of the patient-derived clinical empathy model (Figure 1) corresponding to the absence or deficiency of clinical empathy, and corresponding participant quotations

| Item on Model                                    | Patient-perceived phenomena                                                                                             | Select quotations*                                                                                                                                                                                                                                                                                                                                                                                                                                                                                         |
|--------------------------------------------------|-------------------------------------------------------------------------------------------------------------------------|------------------------------------------------------------------------------------------------------------------------------------------------------------------------------------------------------------------------------------------------------------------------------------------------------------------------------------------------------------------------------------------------------------------------------------------------------------------------------------------------------------|
| Physician factors (inhibitory)                   | Physician specialty<br>Burnout, patient load, setting, time/resources                                                   | "I think the doctors have started to become mechanical in their work because they're so busy and the true compassion of what they're supposed to be doing, has started to dissipate because they know that there's X number of people right behind you that they've got to deal with." – 5A                                                                                                                                                                                                                |
|                                                  | Physician frustration with lack of patient improvement                                                                  | "I think [...] some physicians, they don't respond to people with chronic conditions anymore because they can't deal with the fact that there's nothing they can do to help them.[...]It's burning them out and they don't have a way to deal with that." – 1C                                                                                                                                                                                                                                             |
|                                                  | Ableism/hierarchy in medicine<br>Implicit/explicit biases                                                               | "There's a little less room for empathy, or a little less room for understanding the patient's perspective because it's really hard to do that and be God at the same time." – 5A<br>"[What happens] to a lot of us women [...] is the assumption that when we talk about pains is that [...] 'Oh it's just period pain, that's normal. Oh, it's just some anxiety. Oh, it's just some depression.' [...] Unless you would say it to yourself, then it's not appropriate." – 1C                            |
| Prioritizing physician's ways of knowing         | Not listening to patient                                                                                                | "I just felt like giving up because I was so frustrated, and the frustration had to do with that doctor because he just wasn't listening to me." – 6C                                                                                                                                                                                                                                                                                                                                                      |
|                                                  | Anchoring on assumptions, stereotypes, schemas<br>Not trusting the patient's experience and knowledge of their own body | "The patient knows their body best. They're the one who are the one who lives in it 24/7. Just because the doctor has been to medical school and knows how everything works does not mean that they're the expert on the patient's body." – 1C                                                                                                                                                                                                                                                             |
|                                                  | Seeing the patient as their disease rather than a whole person                                                          | "I think that my biggest problem right now is that [...] he's looking at me as a disease, not as the person that has the disease, and all the issues I'm having with the meds they're putting me on." – 6C                                                                                                                                                                                                                                                                                                 |
| Behaviours conveying absence of clinical empathy | Lack of support/validation<br>Lack of effort, "giving up", dismissiveness                                               | "It's anywhere from being dismissed to belittling. And I think because of the label of my chronic illness, [...] so many things are brushed under the rug of that diagnosis, which actually shouldn't be under that diagnosis." – 2A                                                                                                                                                                                                                                                                       |
|                                                  | Insults, discrimination, "gaslighting"                                                                                  | "I've been called crazy, I've been laughed at." – 2B                                                                                                                                                                                                                                                                                                                                                                                                                                                       |
|                                                  | Inadequate explanations<br>Failure to collaborate with patient                                                          | "When things don't go well, I relate that more to my doctor not providing an explanation why we can't do A, B and C.[...] I find that is lacking as well, the communication and the education of my physician's decision making, and that leaves me in the dark where I feel like my needs aren't being addressed and I'm not being heard." – 5B                                                                                                                                                           |
|                                                  | "Pill-pushing"<br>Patient-blaming/labelling                                                                             | "When they saw my pain medications they said, 'Oh you know what? You're an addict, you need to go to the pain clinic.'" – 1C<br>"I got off of them and my pain didn't change, so now whenever I go to the doctor, they're like, 'Well, you're not on any medications, so you don't really have a problem.'" – 3A                                                                                                                                                                                           |
| Negative processing                              | Loss of trust in physicians and healthcare system                                                                       | "I lost a lot of trust in the medical profession, and I was planning to just stop going to the doctor altogether and just kind of give up. My doctor was giving me no options, no help at all and I just felt like she didn't understand me, she wasn't trying anymore, she just [...] seemed frustrated that nothing she was doing was working to help me." – 1A<br>"I think the part that kind of hits the deepest is that... like I'm losing trust in the entire system. And that's really scary." – 2A |
|                                                  | Questioning own feelings and reality                                                                                    | "Mentally, in my daily life, like the first participant was saying, it makes you feel crazy, it makes you feel like what you're feeling isn't real." – 1A                                                                                                                                                                                                                                                                                                                                                  |
|                                                  | Healthcare trauma & avoidance of future encounters                                                                      | "I usually end up leaving and I'm in tears." – 2B<br>"[A negative appointment] can trigger things like depression and anxiety and can make you feel down for several days, if not more, [...] and then it can give you sort of like PTSD-type symptoms. You get nervous about going to the doctor or specialist to sort of like you go, 'Oh my God, I got                                                                                                                                                  |

|                                                     |                                                                                                                                                                                                     |                                                                                                                                                                                                                                                                                                                                                                                                                                                                                                                                                                                                                                                                                                                                                                                                                                                       |
|-----------------------------------------------------|-----------------------------------------------------------------------------------------------------------------------------------------------------------------------------------------------------|-------------------------------------------------------------------------------------------------------------------------------------------------------------------------------------------------------------------------------------------------------------------------------------------------------------------------------------------------------------------------------------------------------------------------------------------------------------------------------------------------------------------------------------------------------------------------------------------------------------------------------------------------------------------------------------------------------------------------------------------------------------------------------------------------------------------------------------------------------|
|                                                     |                                                                                                                                                                                                     | the appointment again, oh my God.” [...] That hypervigilance sort of stuff – and you can’t sleep the night before because you’re so nervous about ‘How is this doctor going to treat you?’” – 1C                                                                                                                                                                                                                                                                                                                                                                                                                                                                                                                                                                                                                                                      |
|                                                     | Feelings of guilt, burdensomeness, shame for not getting better                                                                                                                                     | “I find myself being a lot more critical of myself for having the condition as if it’s my own personal failure for having it, which I know is wrong, but I just can’t seem to stop myself from doing that.” – 3B<br>“When my doctor is having a good day, and he’s very receptive and listening, I leave that appointment much better than when he’s having a dismissive type day – the whole thing just starts on a downward spiral and I feel worse about myself and guiltier about needing him and everything.” – 3C                                                                                                                                                                                                                                                                                                                               |
|                                                     | Loss of hope                                                                                                                                                                                        | “I think it does strip that that hope away bit by bit and it’s hard to care about yourself when no one else like seems to care, you know?” – 5C                                                                                                                                                                                                                                                                                                                                                                                                                                                                                                                                                                                                                                                                                                       |
| Disrupted personal life                             | Impacts ability to work & relationships with partner/family                                                                                                                                         | “They want you to lose weight but [...] I have to get some exercise in order to lose weight and in order to exercise I have to be relatively pain free because if I exercise I’m going to be in even more pain and then I can’t go to work.” – 1B<br>“I feel very hopeless because I’m trying to live my life, I have a child and a full-time job and when you told me ‘This is just your life now’ and I’m barely getting by, that’s not very hopeful. Just give me some hope.” – 1A                                                                                                                                                                                                                                                                                                                                                                 |
| Healthcare: reduced quality & increased utilization | More appointments & referrals                                                                                                                                                                       | “Well, we don’t have time to address all of this today,’ whereas I feel like if I could just have that one chunk of time, I wouldn’t have to come back as often.” – 3C<br>You feel some anger towards the system but at the same time you feel guilt because you keep going back, hoping for a different result.” – 3B                                                                                                                                                                                                                                                                                                                                                                                                                                                                                                                                |
|                                                     | Inaccessible treatments & non-adherence                                                                                                                                                             | “I waited on a waiting list for almost five years, and they gave me one [...] 30 miles away. [...] When you’re sick, you can’t do that on a taxi.” – 4B<br>“I can’t pay for a lot of things that my doctor says I need.” – 2A                                                                                                                                                                                                                                                                                                                                                                                                                                                                                                                                                                                                                         |
|                                                     | Patients avoid seeking healthcare                                                                                                                                                                   | “Shortness of breath, chest pain in the middle and on the left, like really classic symptoms that you should go to the hospital, and I just didn’t want to. Like, I was so exhausted from doctors, that I didn’t want to.” – 2A<br>“My eyes went yellow before I would go to the doctor because I was like, ‘They’re not going to believe me anyway.’” – 4C                                                                                                                                                                                                                                                                                                                                                                                                                                                                                           |
|                                                     | Patients withholding health information                                                                                                                                                             | “I don’t tell doctors everything anymore either because I feel like [...] if I tell them past experiences then it just nullifies everything I’m about to tell them, and they won’t even look into it because ‘Oh, it’s just part of this.’” – 1A                                                                                                                                                                                                                                                                                                                                                                                                                                                                                                                                                                                                      |
| Negative health outcomes                            | Negative physical health outcomes: mediated by stress, unhealthy lifestyle choices, delayed pursuit of care by patient, leaving against medical advice, non-adherence, or delayed/refused treatment | “My emotional health which unfortunately affects my physical health given the condition that I’m dealing with, [...] I go home cranky or I grab a chocolate bar because I am an emotional eater.” – 5B<br>“And the doctor at the hospital didn’t want to do tests because he was like ‘Oh, you have this chronic pain condition, that’s probably what it is.’ [...] And I had fucking pneumonia.” – 2A<br>“I know that stress makes pain worse. [...] basically anytime I have to deal with doctor, I know I’m going to flare.” – 2A<br>“And when they finally did diagnose it, it was so aggressive that they’ve had a hell of a time getting it brought back down. And I think if someone had just really sat and listened in the first place, a lot of steps could probably have been skipped and she wouldn’t have suffered as much either.” – 3C |
|                                                     | Negative mental health outcomes: reduced self-esteem, emotional exhaustion, anxiety, depression, and suicidal ideation                                                                              | “It becomes difficult to live day-to-day, and it’s difficult when the person who’s supposed to understand you, doesn’t. [...] It feels like I’m just screaming into the void sometimes.” – 5C<br>“I really think doctors need to know that... their decisions, their diagnosis, the way that they treat their patients can really, really make a huge impact. I’ve been <b>to the point where I just don’t want to be here</b> . I have two kids, and that’s what’s kept me here.” – 2B<br>“If I’m not listened to or feel like my medical professional is partnering with me then, to a certain extent, it’s almost ‘ <b>What’s the point of being alive?</b> ’” – 1B                                                                                                                                                                                |

\*Filler words such as “um” and “like” may be omitted from quotations

**Table 3.** Components of the patient-derived clinical empathy model (Figure 1) corresponding to the presence of clinical empathy, and corresponding participant quotations

| Item on model                                                | Patient-perceived phenomena                                                                                                                                                                                                                                                        | Select quotations*                                                                                                                                                                                                                                                                                                                                                                                                                                                                                                                                                                                                                                                                                                                                                                                         |
|--------------------------------------------------------------|------------------------------------------------------------------------------------------------------------------------------------------------------------------------------------------------------------------------------------------------------------------------------------|------------------------------------------------------------------------------------------------------------------------------------------------------------------------------------------------------------------------------------------------------------------------------------------------------------------------------------------------------------------------------------------------------------------------------------------------------------------------------------------------------------------------------------------------------------------------------------------------------------------------------------------------------------------------------------------------------------------------------------------------------------------------------------------------------------|
| <b>Physician factors (facilitative)</b>                      | Adequate time & resources<br>Being treated kindly by patients<br>Personal experience with chronic illness                                                                                                                                                                          | “I think there may be some room here for training patients to try to recognize that doctors are people too.” -6A<br>“Having cancer made him a better doctor because, all of the sudden, he realized what it was like being helpless, and in that bed, and waiting for somebody who knew something to do something, and having no control.” -5A                                                                                                                                                                                                                                                                                                                                                                                                                                                             |
| <b>Engaging with patient’s experience</b>                    | Listening mindfully to the patient to learn about their experience, while acknowledging the physician cannot fully understand it<br>Seeing the patient as a whole person rather than just their disease<br>Believing and trusting the patient as an expert on their own body       | “There’s only one that’s been able to communicate to me [...] not that they understand, but they’re truthful in the fact that they say that they <i>can’t</i> understand.” – 2A<br>“She heard me and she knew my whole story as a human being, not just my illness.” – 4A<br>“You know, if a doctor believes, and I go home, I’m happy, I’m very happy.” – 6D                                                                                                                                                                                                                                                                                                                                                                                                                                              |
| <b>Behaviours demonstrating presence of clinical empathy</b> | Communication that is honest, supportive, validating, and normalizing<br>Willingness to put in effort, even if the physician does not know exactly what to do<br>Trauma-informed care<br>Collaborating with the patient to develop a care plan, valuing their perspective/research | “The doctor taking the time and acknowledging feelings, validating feelings, and providing that [...] reassurance or encouragement, or just saying ‘Yes, it sucks, but this is what we’re going to do.’” – 5B<br>“I’ve had some times with doctors who’ve been really, really great. Like, I’ve been able to come with them to research about medications that I thought, ‘Hey, can we try this?’ and we’ve talked about, and we’ve come up with a collaborative plan, and that’s been awesome.” – 1C                                                                                                                                                                                                                                                                                                      |
| <b>Positive processing</b>                                   | Feelings hope, empowerment, and increased trust in the physician and healthcare system                                                                                                                                                                                             | “I guess just to listen to you and make you feel [...] validated and that it’s not all in your head, and just give you some hope to just get through to your next appointment, something to try. [...] My mood definitely gets better, like I feel less hopeless, less depressed, just not as scared or [...] nervous to go to the doctor the next time because of, you know, how is this appointment gonna go.” – 1A                                                                                                                                                                                                                                                                                                                                                                                      |
| <b>Enhanced healthcare</b>                                   | Patients more likely to self-educate, try new treatments, adhere to treatments, and make healthier lifestyle changes                                                                                                                                                               | “I’ve been a smoker for 43 years, on and off, and this time was the easiest time for me to quit, [...] I think because my physician was supporting me and all of the aspects.” - 1B                                                                                                                                                                                                                                                                                                                                                                                                                                                                                                                                                                                                                        |
| <b>Enhanced mental health &amp; wellbeing</b>                | Improvement of mood and energy levels<br>Increased patient confidence, self-image, and resilience                                                                                                                                                                                  | “‘If you can’t see the light at the end of the tunnel, there’s no point in being alive’ is the way I talked to myself in my head. [...] I think I have renewed hope because I have a medical professional on my side. [...] I don’t even think you can quantify or put a value to having somebody that works with you and listens to you and it makes you feel valid.” – 1B<br>“You feel more hopeful. Not necessarily that your pain will go away or your disease will go away. It’s just that I’ll have as normal life as I possible can given my current condition. And you feel validated, so it gives you the courage to try new things, it improves your actual physical and mental energy, and, trust me, when you suffer from chronic pain, that is depleted before you even get out of bed.” – 1B |

\*Filler words such as “um” and “like” may be omitted from quotations

**Table 4.** Patient recommendations for medical education to improve clinical empathy in future physicians.

| <b>Category</b>                 | <b>Suggestions for Improvement</b>                                                                                                                                                                                                                                                                                                                                                               |
|---------------------------------|--------------------------------------------------------------------------------------------------------------------------------------------------------------------------------------------------------------------------------------------------------------------------------------------------------------------------------------------------------------------------------------------------|
| Admission to medical school     | <ul style="list-style-type: none"> <li>• Factor diversity and emotional intelligence into selection</li> <li>• Consider personal experience as a patient to be an asset in applicants</li> </ul>                                                                                                                                                                                                 |
| Curriculum content              | <ul style="list-style-type: none"> <li>• The interplay between mental and physical health</li> <li>• Cultural humility and anti-oppression training</li> <li>• Non-medical factors impacting health, such as socioeconomic status and healthcare accessibility</li> <li>• Alternative treatments that patients may be receiving (for physician awareness/understanding, not practice)</li> </ul> |
| Practical training              | <ul style="list-style-type: none"> <li>• Formal training on interviewing and therapy techniques</li> <li>• Evaluation of students' interpersonal and communication skills</li> </ul>                                                                                                                                                                                                             |
| Knowledge of patient experience | <ul style="list-style-type: none"> <li>• Incorporate patient stories, especially those told by patients themselves</li> <li>• Teaching about medical trauma and medical gaslighting, and the emotional implications for patients</li> </ul>                                                                                                                                                      |
| Physician mental health         | <ul style="list-style-type: none"> <li>• Teaching on strategies to identify and mitigate burnout</li> </ul>                                                                                                                                                                                                                                                                                      |

1  
2  
3 **APPENDIX A: Virtual groups used for participant recruitment**  
4  
5

6 The Facebook groups that permitted advertisement of the study were:

- 7 • Surviving Chronic Pain in Canada (1.7K members)
- 8 • Mental Health Support in Canada (1.3K members)
- 9 • Canadian Cancer Support Group (550 members)
- 10 • Rheumatoid Arthritis Canada (2.5K members)
- 11 • Asthma Support for Canadians (279 members)
- 12 • Canadian Disability Alliance (1.5K members)
- 13 • Disability/Special Needs Benefits in Canada (1.5K members)
- 14
- 15
- 16
- 17

18 Due to a paucity of male participants, recruitment was expanded off Facebook through the  
19 Prostate Cancer Support Canada e-newsletter.  
20  
21  
22  
23  
24  
25  
26  
27  
28  
29  
30  
31  
32  
33  
34  
35  
36  
37  
38  
39  
40  
41  
42  
43  
44  
45  
46  
47  
48  
49  
50  
51  
52  
53  
54  
55  
56  
57  
58  
59  
60

Confidential



## APPENDIX B: Semi-structured focus group guide

*[Note: general prompting phrases such as “Would you like to elaborate on that?” will be used throughout at the moderator’s discretion. Questions may be modified, reordered, or reworded depending on participants’ responses]*

We would like to talk about your physician’s **ability to understand your illness experience, their ability to communicate that understanding to you, AND their ability to act on that understanding when providing care** *[type this into Zoom chat in case participants wish to reference it]*. We encourage you to use personal experiences and examples wherever you feel comfortable, and elaborate on the thoughts behind your answers as much as you like.

1. Can you describe a time when your physician\* acted this way towards you?
  - a. What did that look like? What did they say or do, for example?
  - b. How did that make you feel?
  - c. Do you think that this affected the care that they provided you?
2. Can you describe a time when your physician has NOT acted this way towards you?
  - a. What did that look like? What did they say or do, for example?
  - b. How did that make you feel?
  - c. Do you think that this affected the care that they provided you?
3. How have those experiences (both positive and negative) impacted your life or overall wellbeing?
4. How important to you is it that your physician is able to...
  - a. Understand your illness experience?
  - b. Communicate that understanding to you?
  - c. Act on their understanding of your experience to provide you care?
5. In general, do you think physicians should improve with respect to these skills – and if so, how?
  - a. For example, do you think these skills should be a part of a physician’s training? What could that look like?

\*Patients may talk about experiences with different physicians for different examples, including both specialists and primary care physicians

### APPENDIX C: Initial code descriptions sent for member-checking

Codes are bolded within the descriptions. Each participant was sent only codes that applied to the focus group they participated in and was given the opportunity to provide anonymous feedback.

1. Patients benefit from knowing their physician **listens to**, **understands**, and **believes** them
2. **Prescriptions** and **referrals** are a prominent aspect of the physician-patient relationship
3. Deficits in the physician-patient relationship can contribute to **delayed treatment**
4. Patients often fear being perceived as “**drug seekers**”
5. The experience of chronic illness also spills over into a person’s ability to cope with/sustain **work or employment** and manage **family dynamics**
6. The patient is an **expert on their own body** and should be consulted/treated as such
7. The relationship with a physician may have significant negative **mental health impacts** on patients such as feelings of frustration, depression, guilt, and anxiety
8. It is helpful when the physician is **supportive** towards their patients
9. It is helpful when the physician **normalizes** and **validates** a patient’s experience and is **supportive** towards them
10. Patients can sense when their physicians are **frustrated** with them
11. The relationship with a physician may contribute to feelings of either **hope or hopelessness**
12. One factor that contributes to overall quality of care is when the physician **takes time** during each appointment and **focuses** on the patient
13. Patients value the opportunity to **collaborate** with their physicians when planning next steps or treatments
14. Patients want to know and see their **physician’s effort** towards developing a diagnosis and treatment plan
15. Patients have often had to deal with **unprofessional behaviour** including insensitive comments from physicians as well as outright **refusal of care**
16. Patients want to have a comprehensive **care plan** and want their physicians to explain/teach them about their treatment to gain **knowledge**
17. The **physician’s competence** and **ability to communicate** directly affect the quality of care
18. Patients are often left feeling like they are **losing trust in the healthcare system** and are **reluctant to engage in care**
19. Patients want **honest physicians**
20. It is helpful when the physician **validates** a patient’s experience
21. Patients have experienced serious **physical health impacts** from delayed or poor treatment by physicians
22. Poor quality of care can be **exhausting** for patients
23. Patients are often told from physicians that **nothing is wrong**
24. **Accessibility of care** is paramount and often overlooked when physicians suggest treatments
25. Physicians should **delegate** tasks to other professionals to improve clinical workflow
26. Medical school curricula should **teach medical students communication skills and patients’ experiences of illness**

- 1
- 2
- 3 27. Patients want to be looked at as a **whole person** by their physician, not just their specific
- 4 disease
- 5
- 6 28. Patients are often cognizant of the challenges physicians face with **burnout** and how this
- 7 affects their ability to provide care
- 8
- 9 29. Patients appreciate when physicians are able to **provide collaborative care** in
- 10 conjunction with many types of healthcare practitioners
- 11
- 12 30. Patients value receiving **trauma-informed care**
- 13
- 14 31. Patients often feel like they are **automatically dismissed** by and are a **burden to**
- 15 physicians
- 16
- 17 32. Patients struggle when physicians **make assumptions** about why they are having a
- 18 particular experience
- 19
- 20 33. Patients struggle when physicians do not **remain current** on the most current medical
- 21 knowledge
- 22
- 23 34. Patients who identify as women sometimes perceive their physicians to be
- 24 **discriminatory** towards them on the basis of gender
- 25
- 26
- 27
- 28
- 29
- 30
- 31
- 32
- 33
- 34
- 35
- 36
- 37
- 38
- 39
- 40
- 41
- 42
- 43
- 44
- 45
- 46
- 47
- 48
- 49
- 50
- 51
- 52
- 53
- 54
- 55
- 56
- 57
- 58
- 59
- 60

## APPENDIX D: Detailed descriptions of patient-perceived phenomena in clinical empathy model (Figure 1)

### Absence/Deficiency of Empathy:

| Item on model                                    | Patient-perceived phenomena                                                                                                                                                                                                                                                                                                                                                                                                                                         |
|--------------------------------------------------|---------------------------------------------------------------------------------------------------------------------------------------------------------------------------------------------------------------------------------------------------------------------------------------------------------------------------------------------------------------------------------------------------------------------------------------------------------------------|
| Physician factors (inhibitory)                   | Ableism and hierarchy are embedded in the culture of medicine, and intersect with other implicit/explicit biases leading to preconceived ideas about patients.                                                                                                                                                                                                                                                                                                      |
|                                                  | Physician specialty may impact level of empathy; emergency department was frequently identified as an empathy-deficient setting.                                                                                                                                                                                                                                                                                                                                    |
|                                                  | Many physicians are very busy, overworked, stressed, and burned out in the system, which leads to a loss of compassion, mechanical care, and lack of mindfulness in interactions with patients.<br><br>When patients have a chronic illness, physician frustration that the patient is not getting better may lead to withdrawal of empathy.                                                                                                                        |
| Prioritizing physician's ways of knowing         | Physicians often fail to take time to focus and listen; subsequently, care is decided based on preconceived ideas rather than through an understanding of the patient's experience.                                                                                                                                                                                                                                                                                 |
|                                                  | Doctors make assumptions based on stereotypes/schemas and may be dismissive of things that stray outside that picture, and do often not trust the patient's knowledge of their own body.                                                                                                                                                                                                                                                                            |
|                                                  | Physical illnesses are inadequately addressed when issues are siloed and patients are not seen as a whole person, including their mental health.                                                                                                                                                                                                                                                                                                                    |
| Behaviours conveying absence of clinical empathy | Non-empathetic communication ranges from that which lacks support/validation to that which is directly insulting/discriminatory.                                                                                                                                                                                                                                                                                                                                    |
|                                                  | Physician dismissal and assertions that nothing is wrong despite patients' experiences of symptoms leads patients to doubt themselves and feel "crazy" (gaslighting).                                                                                                                                                                                                                                                                                               |
|                                                  | Patients become frustrated when they do not understand why their physician chooses to do (or not do) things in their care. The explanation of the action/inaction defines its meaning to the patient, and therefore its impact.                                                                                                                                                                                                                                     |
|                                                  | Physicians often do not understand the complexities of navigating the healthcare system from the patient's perspective and may not provide adequate explanations, leading patients to fall through the cracks.                                                                                                                                                                                                                                                      |
|                                                  | Physicians are perceived as unmotivated to put effort into chronic illness and they "give up" when it does not improve. Patients must be extremely ill for doctors to act or else everything is chalked up to the chronic condition or mental health.                                                                                                                                                                                                               |
|                                                  | Patients often feel that they are responsible for managing their own care and doing their own research, but then are criticized for doing their own research.                                                                                                                                                                                                                                                                                                       |
| Negative processing                              | Patients feel both that pills are "pushed" on them and that they are blamed for taking "too much" medication at the same time. Their pain is not considered serious if they do not take pain medication, and their issues are all chalked up to drug-seeking if they do.                                                                                                                                                                                            |
|                                                  | Patients lose trust that empathy-deficient physicians will treat them appropriately, and also doubt their clinical competence. This mistrust can generalize to the healthcare system as a whole, resulting in a feeling that no one is there to help if they are sick.                                                                                                                                                                                              |
|                                                  | Physician disbelief can lead patients to question their own feelings and sanity.                                                                                                                                                                                                                                                                                                                                                                                    |
|                                                  | Patients develop a trauma response to interactions with physicians, and avoid future encounters as much as possible.                                                                                                                                                                                                                                                                                                                                                |
| Disrupted personal life                          | Patients feel guilt for burdening their doctors, shame for not getting better.                                                                                                                                                                                                                                                                                                                                                                                      |
|                                                  | Hope is essential for resilience in people living with chronic illnesses, and appointments without clinical empathy strip it away.<br><br>What happens in the patient's medical care directly impacts their ability to work, and their work impacts their ability to adhere to treatments.<br><br>Negative emotional/psychological states evoked by physician interactions can be projected onto partner/family, leading to further shame, guilt, and hopelessness. |

|                                                     |                                                                                                                                                                                                                                               |
|-----------------------------------------------------|-----------------------------------------------------------------------------------------------------------------------------------------------------------------------------------------------------------------------------------------------|
| Healthcare: reduced quality & increased utilization | When the physician is distracted or not truly listening, patients end up need more appointments and issues take longer to solve.                                                                                                              |
|                                                     | Lack of effort/listening leads to inappropriate referrals.                                                                                                                                                                                    |
|                                                     | Many treatments that physicians prescribe do not reflect an understanding of the patient’s location and financial situation, leading to inaccessible recommendations that the patient cannot adhere to.                                       |
|                                                     | Patients avoid seeking healthcare until they are seriously ill.                                                                                                                                                                               |
|                                                     | Patients refuse medications when they need them to avoid being labelled as a drug-seeker in future.                                                                                                                                           |
| Negative health outcomes                            | Patients are more likely to hide information or lie to physicians for fear of information being used against them.                                                                                                                            |
|                                                     | The cycle of self-advocacy and being dismissed leads to profound exhaustion.                                                                                                                                                                  |
|                                                     | Gaslighting leads to self-doubt and reduced self-esteem in patients.                                                                                                                                                                          |
|                                                     | Patients often experience a “spiraling” of hopelessness after appointments, leading to depression, anxiety, and suicidal ideation attributed to the physician interaction (not the illness).                                                  |
|                                                     | Poor physical health outcomes may occur secondary to mental health impacts, as well as due to delayed pursuit of care by patient, leaving against medical advice, non-adherence to treatment, or delayed/refused administration of treatment. |

### Presence of Empathy:

| Item on model                                         | Patient-perceived phenomena                                                                                                                                                                                                                                                                     |
|-------------------------------------------------------|-------------------------------------------------------------------------------------------------------------------------------------------------------------------------------------------------------------------------------------------------------------------------------------------------|
| Physician factors (facilitative)                      | Physicians who have adequate time and resources often display more empathy.                                                                                                                                                                                                                     |
|                                                       | Patients treating physicians with kindness and empathy helps evoke reciprocity.                                                                                                                                                                                                                 |
|                                                       | Physicians who have experienced chronic illness are often the most empathetic.                                                                                                                                                                                                                  |
| Engaging with patient’s experience                    | Clinical empathy involves taking time to truly listen mindfully to the patient to learn about their experience with their illness and the medical system, while acknowledging that they cannot fully understand it. This involves seeing them as a whole person rather than just their disease. |
|                                                       | Patients need their physician to believe them and trust them as an expert on their own body.                                                                                                                                                                                                    |
| Behaviours demonstrating presence of clinical empathy | Patients value communication that is honest, supportive, validating, and normalizing.                                                                                                                                                                                                           |
|                                                       | Patients need to feel like their physician is willing to put in effort, even if they do not know exactly what to do                                                                                                                                                                             |
|                                                       | A trauma-informed approach shows empathy for many patients who have experienced healthcare (or other) trauma.                                                                                                                                                                                   |
| Positive processing                                   | Patients want to be an active member in developing a collaborative care plan, with their perspective and research valued.                                                                                                                                                                       |
|                                                       | Clinical empathy fosters feelings of hope and empowerment in patients, as well as increased trust in the physician and healthcare system.                                                                                                                                                       |
| Enhanced healthcare                                   | When patients have hope regarding their healthcare, they are more empowered to educate themselves, try new treatments, adhere to treatments, and make healthier lifestyle changes.                                                                                                              |
| Enhanced mental health & wellbeing                    | Clinical empathy itself has direct positive effects on mood and energy levels, is protective of patient self-image, and increases patient confidence and resilience.                                                                                                                            |
